# Supplementary material
Source: PubMed Central journal article supplement (PMC6583370)
Supplement: jamadermatol-154-1417-s001.pdf [file jamadermatol-154-1417-s001.pdf]

## Supplementary Online Content

Fu Y, Lee C-H, Chi C-C. Association of psoriasis with inflammatory bowel disease: a systematic review and meta-analysis. *JAMA Dermatol*. Published online October 24, 2018. doi:10.1001/jamadermatol.2018.3631

### **eTable.** Search Strategy

This supplementary material has been provided by the authors to give readers additional information about their work.

**eTable. Search Strategy**

---

**MEDLINE & Cochrane Library search strategy**

1. psoria\$.m\_titl.
  2. exp Inflammatory Bowel Diseases/
  3. inflammatory bowel disease.mp.
  4. exp Crohn Disease/
  5. Crohn\$ disease.mp.
  6. Crohn\$ colitis.mp.
  7. granulomatous colitis.mp.
  8. Crohn\$ enteritis.mp.
  9. regional enteritis.mp.
  10. exp Colitis, Ulcerative/
  11. ulcerative colitis.mp.
  12. idiopathic proctocolitis.mp.
  13. pancolitis.mp.
  14. colitis gravis.mp.
  15. ulcerative proctosigmoiditis.mp.
  16. or/2-15
  17. 1 and 16
- 

**Embase search strategy**

1. psoriasis:ti
  2. psoriatic:ti
  3. #1 or #2
  4. 'inflammatory bowel disease'/exp
  5. 'inflammatory bowel disease'
  6. 'crohn disease'/exp
  7. 'crohn\$ disease'
  8. 'crohn\$ colitis'
  9. 'granulomatous colitis'
  10. 'crohn\$ enteritis'
  11. 'regional enteritis'
  12. 'ulcerative colitis'/exp
  13. 'ulcerative colitis'
  14. 'idiopathic proctocolitis'
  15. 'pancolitis'
-

- 
16. 'colitis gravis'
  17. 'ulcerative proctosigmoiditis'
  18. or/4-17
  19. 3 and 18
-
